# Supplementary material for: CRISPR/dCas9-Dnmt3a-mediated targeted DNA methylation of APP rescues brain pathology in a mouse model of Alzheimer’s disease
Source: PubMed Central journal article supplement (PMC9476342; doi:10.1186/s40035-022-00314-0), 2022-09-15
Supplement: 40035_2022_314_MOESM1_ESM.pdf [file 40035_2022_314_MOESM1_ESM.pdf]

**Supplementary Table S1. sgRNA sequences targeting *APP*.**

| Target | Sequence                         | Location | Strand |
|--------|----------------------------------|----------|--------|
| APP    | ACCGGGAGCAGAGCGAGCGCG <u>GGG</u> | -94      | +      |
| APP    | GCGGCGGGAGGCGAGAGCACC <u>GGG</u> | -112     | +      |
| APP    | GGCGGGATCAGCTGACTCTGC <u>CGG</u> | -189     | +      |
| APP    | AGTCCCCGAGGCTCCGCTAG <u>GGG</u>  | -228     | +      |

Protospacer adjacent motif sequences are underlined in red.

**Supplementary Table S2. Predicted off-target sites for –189 sgRNA activity.**

| No. | Target                             | Chromosome | Position | Direction |
|-----|------------------------------------|------------|----------|-----------|
| ON  | GGCGGGATCAGCTGACTCTG <b>CCGG</b>   | chr16      | 85173738 | -         |
| OF1 | GGCGGGgTCAGCTGCCACTCTGa <b>GGG</b> | chr19      | 41105854 | -         |
| OF2 | G--GaGATCAGgTGACTCTG <b>CTGG</b>   | chr9       | 44249405 | -         |
| OF3 | GGCGGGATC--CTGcCTCTG <b>tGGG</b>   | chr9       | 58076622 | -         |
| OF4 | Ga-GGGATCtGCTGACTCTGC <b>AGG</b>   | chr5       | 30423430 | +         |
| OF5 | GGCGGGgTCAG—GACTCcGC <b>AGG</b>    | chr17      | 63936803 | -         |
| OF6 | GGCtGGAgCAGCTG--TCTGC <b>AGG</b>   | chr13      | 46525464 | +         |

Off-target sites were predicted as those having no more than two mismatches compared to the on-target sequence. ON, on-target; OF, off-target.

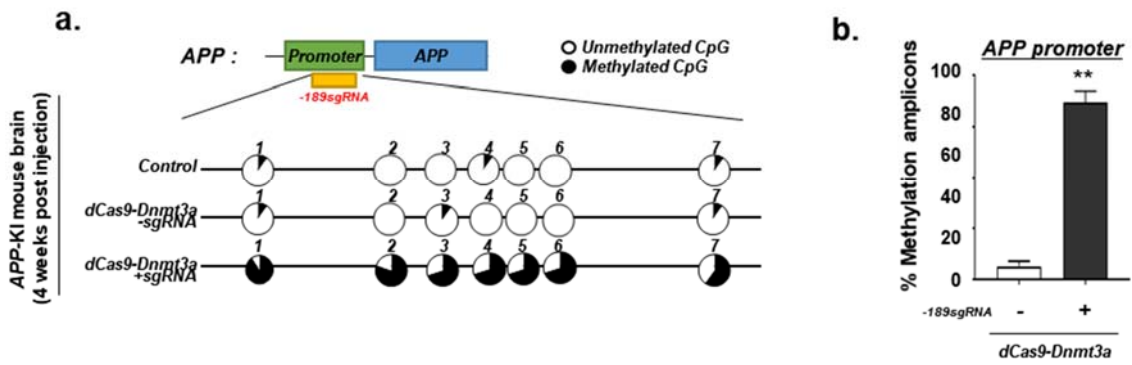

**Supplementary Figure S1. Bisulfite sequencing analysis of the methylation status of the *APP* promoter in the hippocampus of *APP*-KI mice.** (a) Bisulfite sequencing analysis of the promoter region of *APP* in the *APP*-KI mouse hippocampus transduced with -189 sgRNA and dCas9-Dnmt3a 4 weeks after injection. (b) Quantification of methylated amplicons. Data are expressed as mean  $\pm$  SEM ( $n = 3$ ). \*\* $P < 0.01$ , two-sided Student's  $t$ -test.

Figure 4b

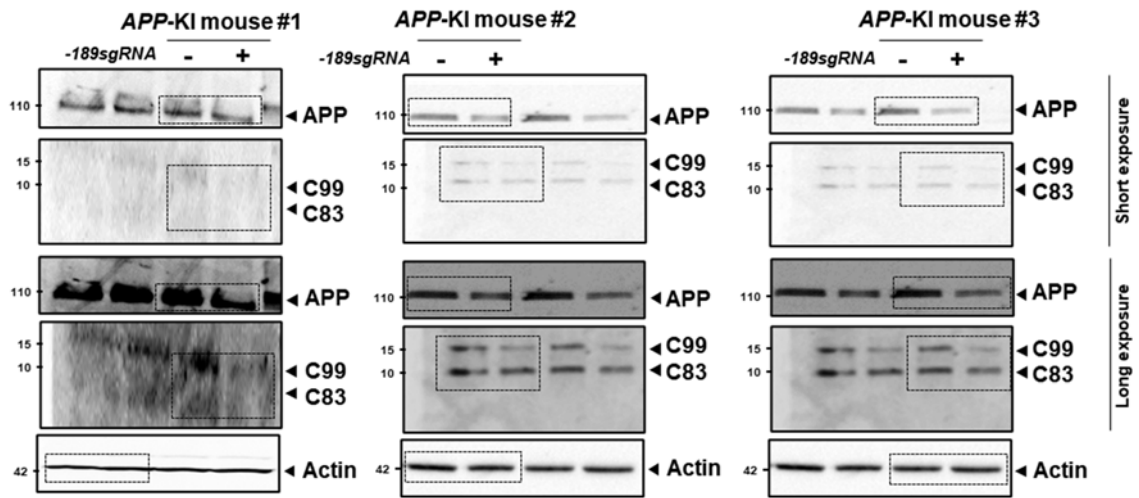

Supplementary Figure S2. Full scans of the western blots shown in Fig. 4b. Blots for all three independent experiments are shown.
